# Supplementary material for: Oxygen Radical-Generating Metabolites Secreted by Eutypa and Esca Fungal Consortia: Understanding the Mechanisms Behind Grapevine Wood Deterioration and Pathogenesis
Source: Frontiers journal article supplement (doi:10.3389/fpls.2022.921961), 2022-07-04
Supplement: Data_Sheet_1.PDF [file Data_Sheet_1.PDF]

## **SUPPLEMENTAL DATA FILE**

### **Oxygen radical-generating metabolites secreted by eutypa and Esca fungal consortia**

**Gabriel Perez-Gonzalez<sup>1</sup>, Dana Sebestyen<sup>1</sup>, Elsa Petit<sup>2</sup>, Jody Jellison<sup>3</sup> Laura Mugnai<sup>4</sup>, Eric Gelhaye<sup>5</sup>, Norman Lee<sup>6</sup>, Sibylle Farine<sup>7</sup>, Christophe Bertsch<sup>7</sup>, Barry Goodell<sup>1\*</sup>**

<sup>1</sup>Department of Microbiology, University of Massachusetts, Amherst, MA 01003, U.S.A

<sup>2</sup> Stockbridge School of Agriculture, University of Massachusetts, Amherst, MA 01003, U.S.A

<sup>3</sup> Center for Agriculture, Food and the Environment, University of Massachusetts, Amherst, MA 01003 U.S.A.

<sup>4</sup>Department of Agricultural, Food, Environmental and Forestry Science and Technology, University of Florence, Firenze 50144, Italy

<sup>5</sup>Université de Lorraine, INRAE, Interactions Arbres-Microorganismes, F-54000 Nancy, France

<sup>6</sup>Chemical Instrumentation Center (CIC), Boston University, Boston, MA 02215, U.S.A

<sup>7</sup>Laboratoire Vigne Biotechnologies et Environnement EA-3991. Université de Haute-Alsace, Colmar 68008, France

\*Corresponding author: Barry Goodell; Email: bgoodell@umass.edu

## **Appendix A. Supplementary data**

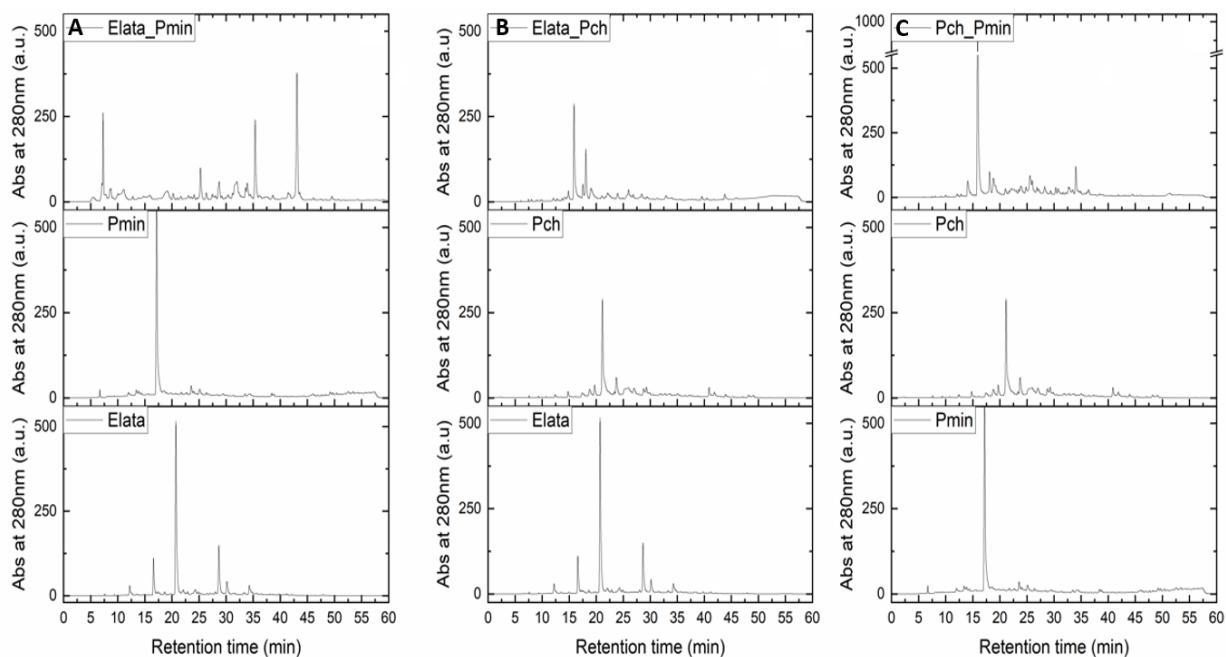

**Fig. S1** HPLC chromatograms of Elata\_Pmin (A), Elata\_Pch (B) and Pch\_Pmin (C) fungal metabolites with their respective single culture chromatograms. All absorbance values for metabolites were read at 280nm.

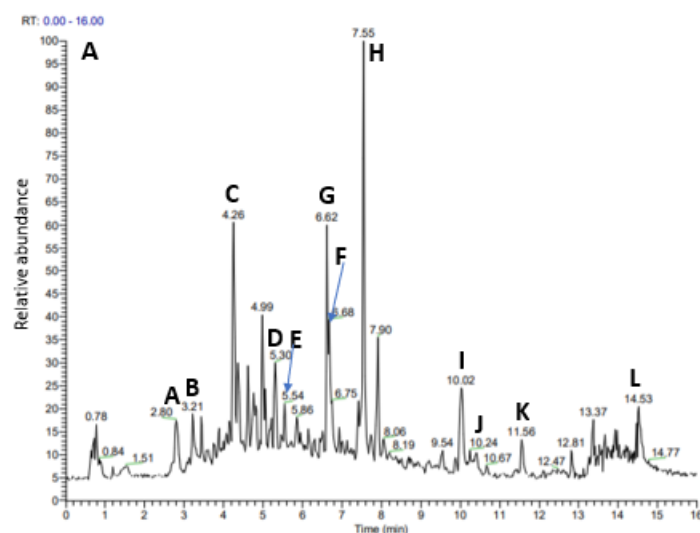

| Compound                                    | Formula                 |
|---------------------------------------------|-------------------------|
| A Loganetin                                 | $C_{11}H_{16}O_5$       |
| B Terrein <sup>a</sup>                      | $C_8H_{10}O_3$          |
| C Guaietolin                                | $C_{11}H_{16}O_4$       |
| D Polygonolide                              | $C_{12}H_{12}O_4$       |
| E Genipin                                   | $C_{11}H_{14}O_5$       |
| F 3,4',5-Biphenyltriol                      | $C_{12}H_{10}O_3$       |
| G Acetamidrid                               | $C_{10}H_{11}ClN_4$     |
| H Pyochelin <sup>a</sup>                    | $C_{14}H_{16}N_2O_3S_2$ |
| I Biocytin                                  | $C_{16}H_{28}N_4O_4S$   |
| J Artemotil                                 | $C_{17}H_{28}O_5$       |
| K Tretinoin                                 | $C_{20}H_{28}O_2$       |
| L 2,2',3,4',5,5',6-Heptachloro-4-biphenylol | $C_{12}H_5Cl_7O$        |

<sup>a</sup>Known iron reducer

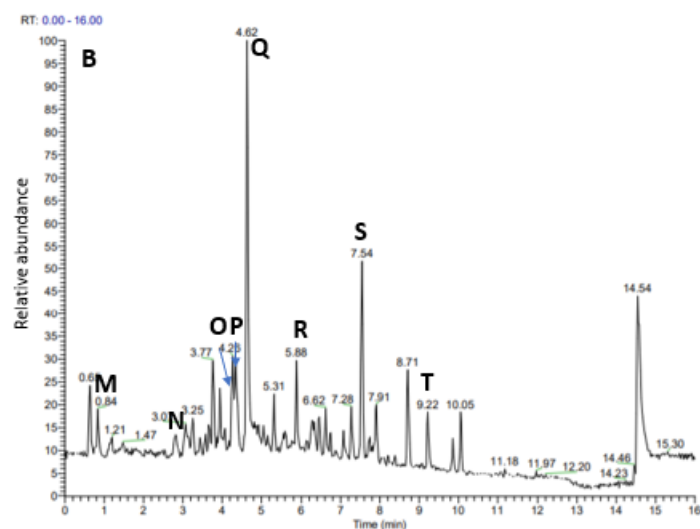

| Compound                                             | Formula                 |
|------------------------------------------------------|-------------------------|
| M 2-Mercaptoethanol                                  | $C_2H_6OS$              |
| N Dimethyl (3-oxocyclohexyl)malonate                 | $C_{11}H_{16}O_5$       |
| O Guaietolin                                         | $C_{11}H_{16}O_4$       |
| P Streptol                                           | $C_7H_{12}O_5$          |
| Q 3,4-dihydroxybenzoic acid <sup>a</sup>             | $C_7H_6O_4$             |
| R 4-oxo-5-phenylpentanoic acid                       | $C_{11}H_{12}O_3$       |
| S Pyochelin <sup>a</sup>                             | $C_{14}H_{16}N_2O_3S_2$ |
| T 2-(4-hydroxy-1,3-thiazol-2-yl)-1-phenylethan-1-one | $C_{11}H_{10}NO_2S$     |

<sup>a</sup>Known iron reducer

**Fig. S2** Total Ion Current (TIC) chromatogram (left) and LMW phenolics produced (right) for *Eutypa lata* metabolite extracts in negative (A) and positive (B) ionization mode. Peaks were selected by largest area and peak height.

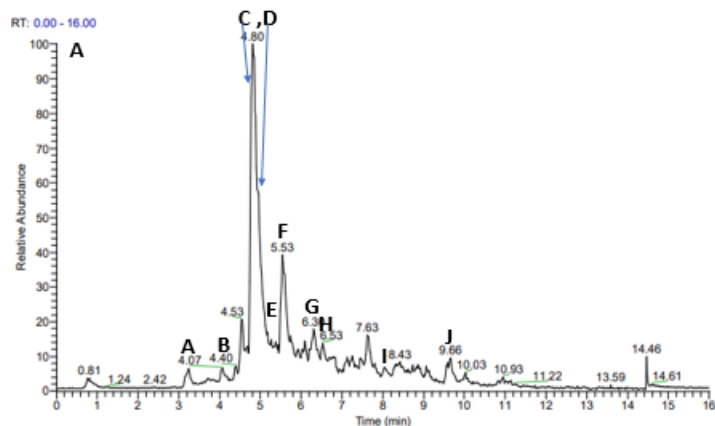

| Compound                                                                                           | Formula            |
|----------------------------------------------------------------------------------------------------|--------------------|
| A Citrazinc acid                                                                                   | $C_8H_5NO_4$       |
| B 7-Hydroxy-4-methylcoumarin                                                                       | $C_{10}H_8O_3$     |
| C Sinapic acid methyl ester <sup>a</sup>                                                           | $C_{12}H_{14}O_5$  |
| D Dihydroferulic acid <sup>a</sup>                                                                 | $C_{10}H_{12}O_4$  |
| E 4-hydroxy-3-(3-methylbut-2-enyl)benzoic acid                                                     | $C_{13}H_{16}O_3$  |
| F Homovanillic acid                                                                                | $C_9H_{10}O_4$     |
| G (2R)-7-hydroxy-8-(2-hydroxyethyl)-5-methoxy-2-methyl-2,3-dihydrochromen-4-one                    | $C_{13}H_{16}O_5$  |
| H 2-[2-[(Z)-pent-2-enyl]-3-[3,4,5-trihydroxy-6-(hydroxymethyl)oxan-2-yl]oxycyclopentyl]acetic acid | $C_{18}H_{30}O_8$  |
| I Estrone-3-(beta-D-glucuronide)                                                                   | $C_{21}H_{30}O_8$  |
| J Testosterone sulfate                                                                             | $C_{19}H_{28}O_5S$ |

<sup>a</sup>Known iron reducer

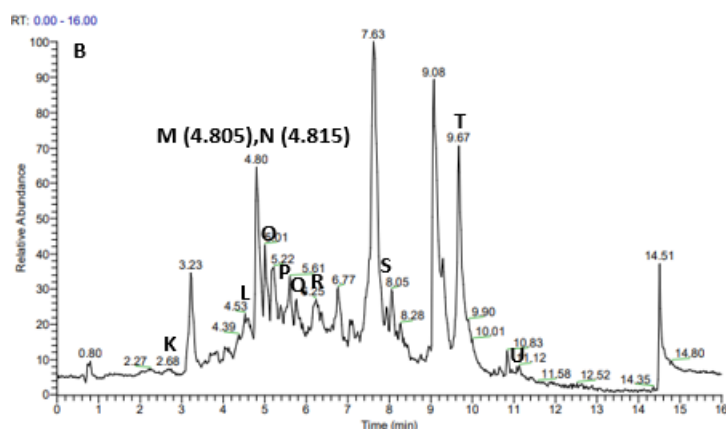

| Compound                                                                        | Formula             |
|---------------------------------------------------------------------------------|---------------------|
| K Guvacoline                                                                    | $C_7H_{11}NO_2$     |
| L L-(-)-Methionine                                                              | $C_5H_{11}NO_2S$    |
| M 3-Methoxybenzaldehyde                                                         | $C_8H_8O_2$         |
| N 1-[3-ethyl-2,4-dihydroxy-6-methoxyphenyl]butan-1-one                          | $C_{13}H_{18}O_4$   |
| O Jasmonic acid                                                                 | $C_{12}H_{12}O_3$   |
| P Myristicin                                                                    | $C_{11}H_{12}O_3$   |
| Q 2-Hydroxybenzothiazole                                                        | $C_7H_5NOS$         |
| R Benzothiazole                                                                 | $C_7H_5NS$          |
| S 1-Dodecanoyllysocithin                                                        | $C_{20}H_{42}NO_7P$ |
| T Eucalyptol                                                                    | $C_{10}H_{18}O$     |
| U 2-[1-(2H-1,3-benzodioxol-5-yl)propan-2-yl]-6-methoxy-4-(prop-2-en-1-yl)phenol | $C_{20}H_{22}O_4$   |

**Fig. S3** Total Ion Current (TIC) chromatogram (left) and LMW phenolics produced (right) for *Phaeomoniella chlamydospora* metabolite extracts in negative (A) and positive (B) ionization mode. Peaks were selected by largest area and peak height.

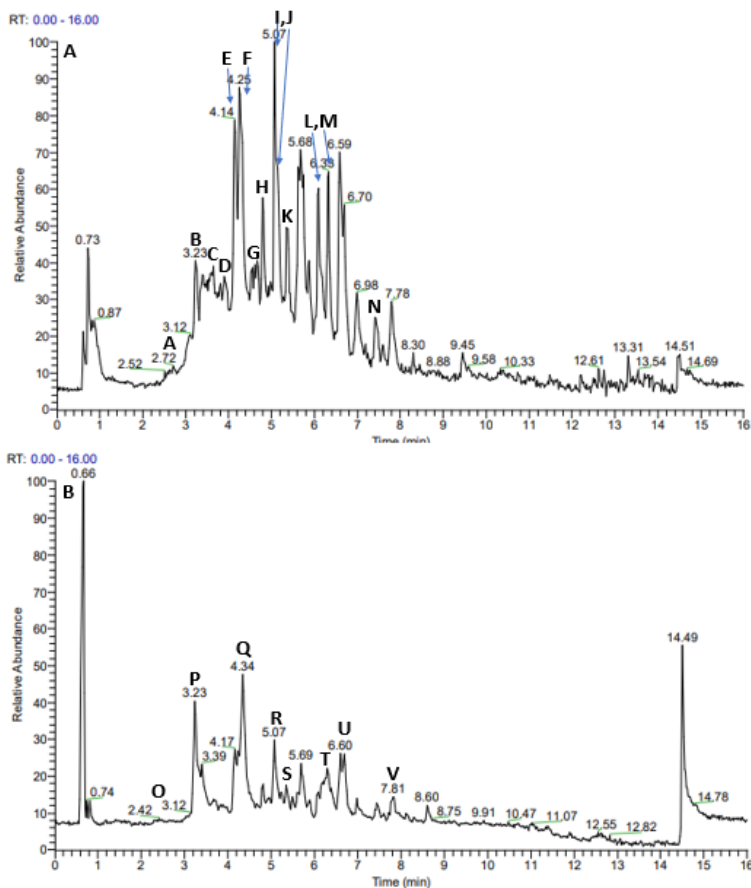

| Compound                                                                                                                                                                             | Formula                                         |
|--------------------------------------------------------------------------------------------------------------------------------------------------------------------------------------|-------------------------------------------------|
| A D-pantothenic acid                                                                                                                                                                 | C <sub>9</sub> H <sub>17</sub> NO <sub>5</sub>  |
| B Citrazinc acid                                                                                                                                                                     | C <sub>6</sub> H <sub>5</sub> NO <sub>4</sub>   |
| C 3-Coumaric acid                                                                                                                                                                    | C <sub>9</sub> H <sub>8</sub> O <sub>3</sub>    |
| D Lignicol                                                                                                                                                                           | C <sub>11</sub> H <sub>12</sub> O <sub>6</sub>  |
| E Phenylacetic acid                                                                                                                                                                  | C <sub>8</sub> H <sub>8</sub> O <sub>2</sub>    |
| F Caffeic acid <sup>a</sup>                                                                                                                                                          | C <sub>8</sub> H <sub>6</sub> O <sub>4</sub>    |
| G Gallic acid <sup>a</sup>                                                                                                                                                           | C <sub>7</sub> H <sub>6</sub> O <sub>5</sub>    |
| H Sinapic acid methyl ether <sup>a</sup>                                                                                                                                             | C <sub>12</sub> H <sub>14</sub> O <sub>5</sub>  |
| I Homogentisic acid <sup>a</sup>                                                                                                                                                     | C <sub>8</sub> H <sub>8</sub> O <sub>4</sub>    |
| J (4S,5Z,6S)-4-(2-methoxy-2-oxoethyl)-5-(2-((E)-3-phenylprop-2-en-1-yl)oxyethylidene)-6-[(2S,3R,4S,5S,6R)-3,4,5-trihydroxy-6-(hydroxymethyl)oxan-2-yl]oxy-4H-pyran-3-carboxylic acid | C <sub>26</sub> H <sub>30</sub> O <sub>13</sub> |
| K 4-hydroxy-3-(3-methylbut-2-enyl)benzoic acid                                                                                                                                       | C <sub>12</sub> H <sub>14</sub> O <sub>3</sub>  |
| L 2-Hydroxybenzothiazole                                                                                                                                                             | C <sub>7</sub> H <sub>5</sub> NOS               |
| M 2-[2-[(Z)-pent-2-enyl]-3-[3,4,5-trihydroxy-6-(hydroxymethyl)oxan-2-yl]oxycyclopentyl]acetic acid                                                                                   | C <sub>18</sub> H <sub>30</sub> O <sub>8</sub>  |
| N Nordentatin                                                                                                                                                                        | C <sub>19</sub> H <sub>20</sub> O <sub>4</sub>  |

<sup>a</sup>Known iron reducer

| Compound                      | Formula                                           |
|-------------------------------|---------------------------------------------------|
| O N-Methyl-2-pyrrolidone      | C <sub>5</sub> H <sub>9</sub> NO                  |
| P Sorbic acid                 | C <sub>6</sub> H <sub>8</sub> O <sub>2</sub>      |
| Q Sinapinic acid <sup>a</sup> | C <sub>11</sub> H <sub>12</sub> O <sub>5</sub>    |
| R 4-Methoxycinnamic acid      | C <sub>10</sub> H <sub>10</sub> O <sub>3</sub>    |
| S Tropine                     | C <sub>8</sub> H <sub>15</sub> NO                 |
| T Benzothiazole               | C <sub>7</sub> H <sub>5</sub> NS                  |
| U L-Iditol                    | C <sub>6</sub> H <sub>14</sub> O <sub>6</sub>     |
| V 1-Dodecanoyllysocithin      | C <sub>20</sub> H <sub>42</sub> NO <sub>7</sub> P |

<sup>a</sup>Known iron reducer

**Fig. S4** Total Ion Current (TIC) chromatogram (left) and LMW phenolics produced (right) for *Phaeoacremonium minimum* metabolite extracts in negative (A) and positive (B) ionization mode. Peaks were selected by largest area and peak height.
